# Supplementary material for: Detection of Cognitive Decline by the Montreal Cognitive Assessment in a Latin America Multi-Cohort Study: Normative scores regarding age and educational level
Source: Research Square preprint supplement (doi:10.21203/rs.3.rs-8823313/v1), 2026-02-23
Supplement: Supplementary file 1 [file 4bed186f0efad24f15d808f2.docx]

**Supplementary Figures**


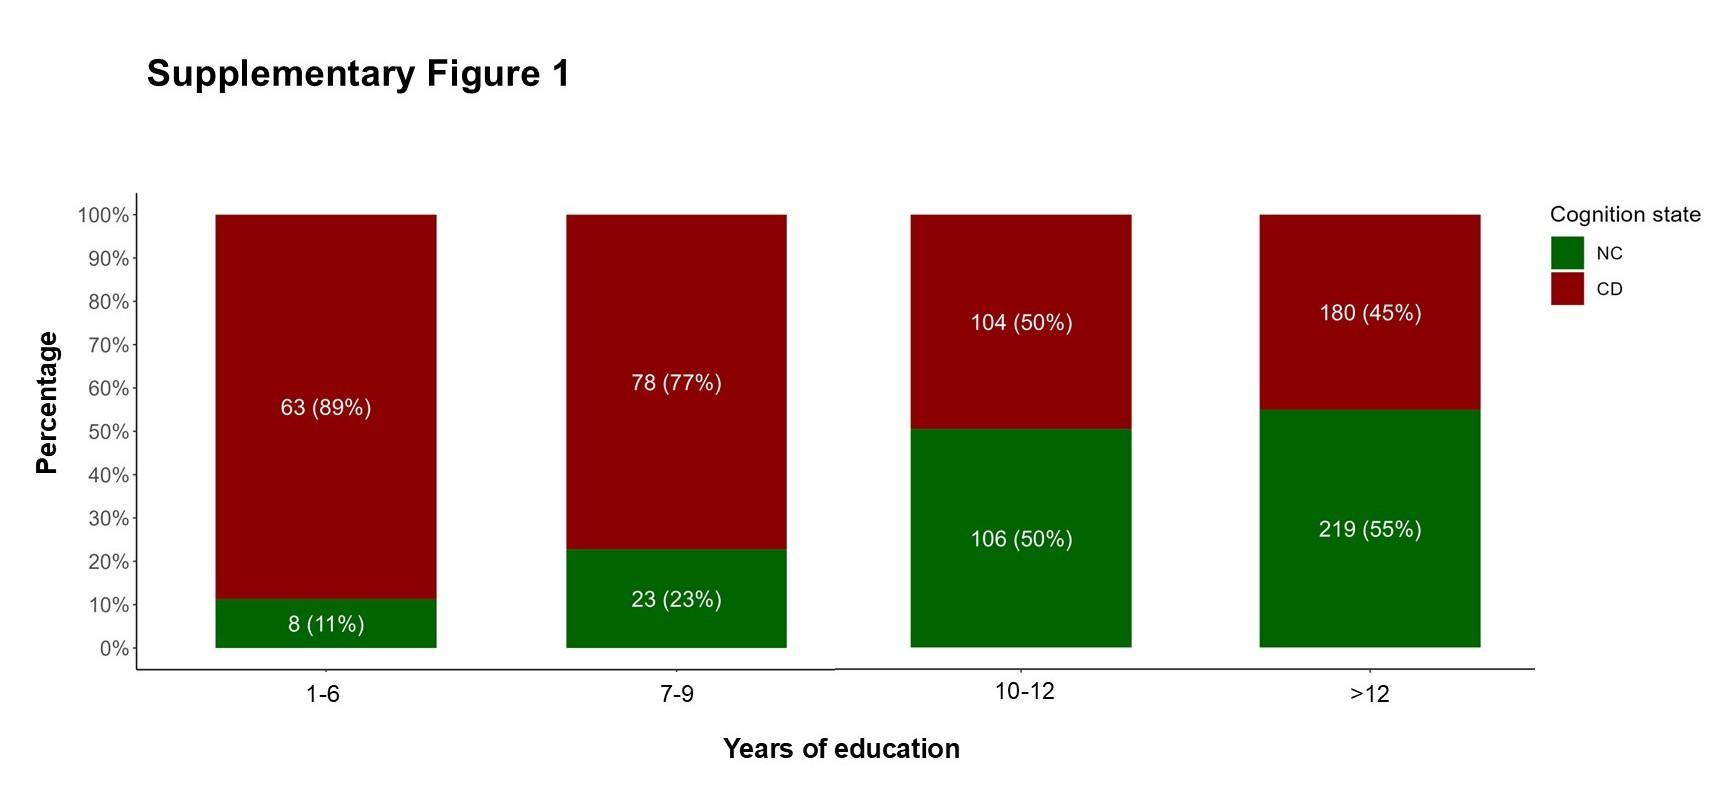
**Supplementary Figure 1.** Prevalence of NC (green) and CD (red), using a MoCA cutoff score of <26, in cognitively healthy Latin American adults as a function of years of education.
